# Supplementary material for: Dynamics and efficiency of photoswitching in biliverdin-binding phytochromes†
Source: Royal Society of Chemistry journal article supplement (doi:10.1039/c9pp00264b), 2019-08-09
Supplement: c9pp00264b1.pdf [file c9pp00264b1.pdf]

## **Dynamics and efficiency of photoswitching in biliverdin-binding phytochromes**

Eleonora Consiglieri, Alexander Gutt, Wolfgang Gärtner, Luiz Schubert, Cristiano

Viappiani, Stefania Abbruzzetti and Aba Losi \*

\*: [aba.losi@unipr.it](mailto:aba.losi@unipr.it)

**Electronic supplementary information (ESI)**

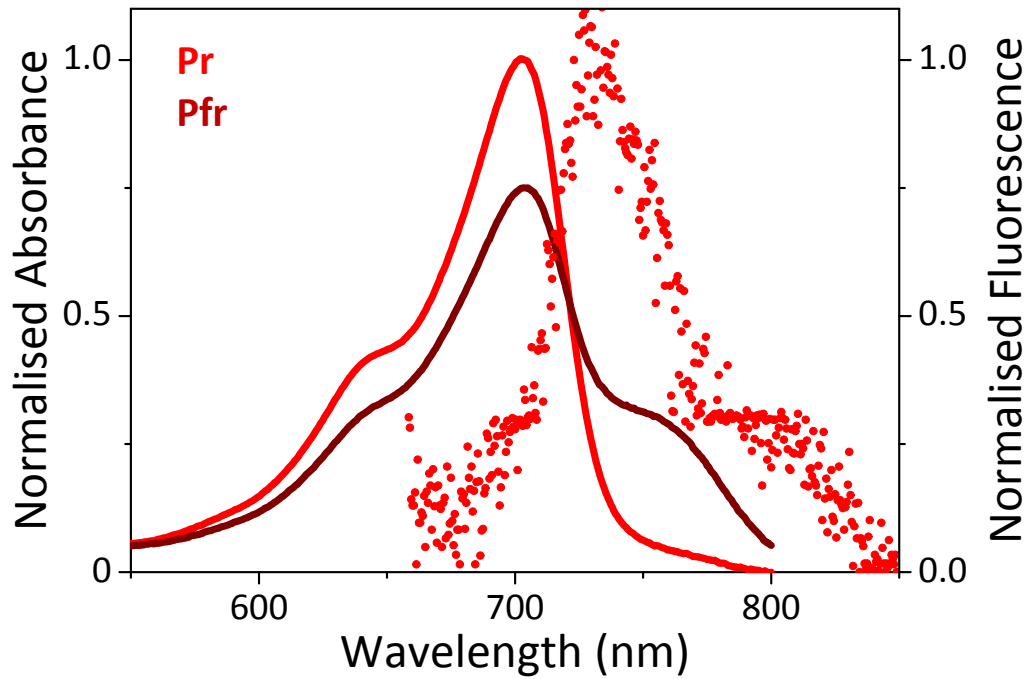

**Fig. S1.** Absorption and fluorescence spectra of PstBphP1 in the Pr (red) and Pfr (dark red) forms. Pfr is not fluorescent. Pr represents the dark adapted form.

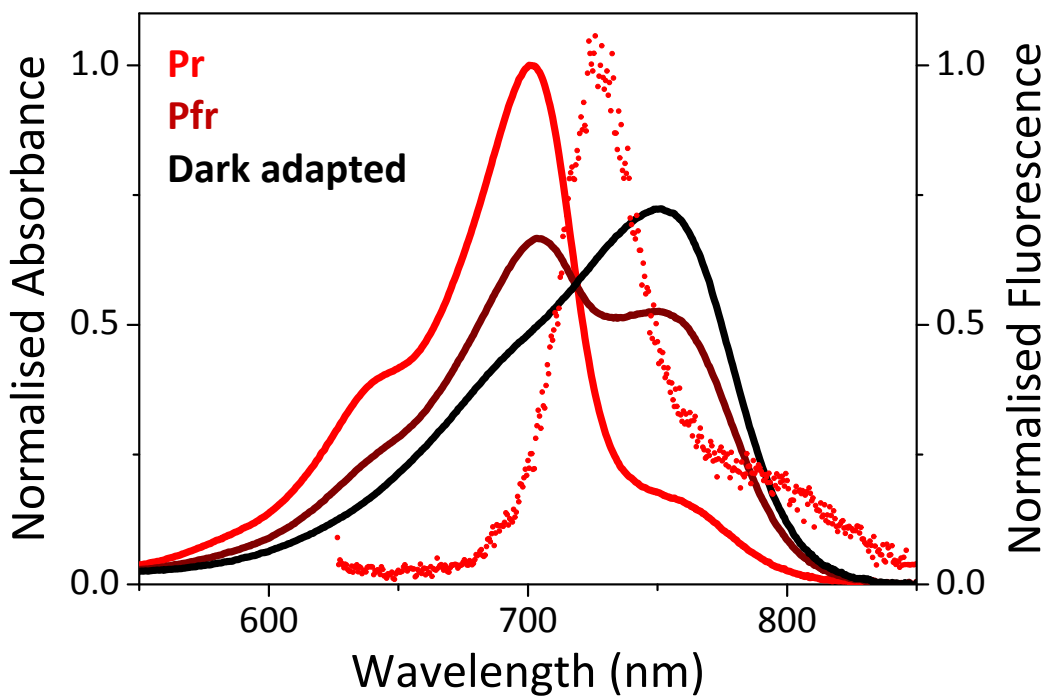

**Fig. S2.** Absorption and fluorescence spectra of PaBphPin in the Pr (red), darPfr (dark red) forms. The black line is the dark adapted state, = 100% Pfr. Pfr is not fluorescent.

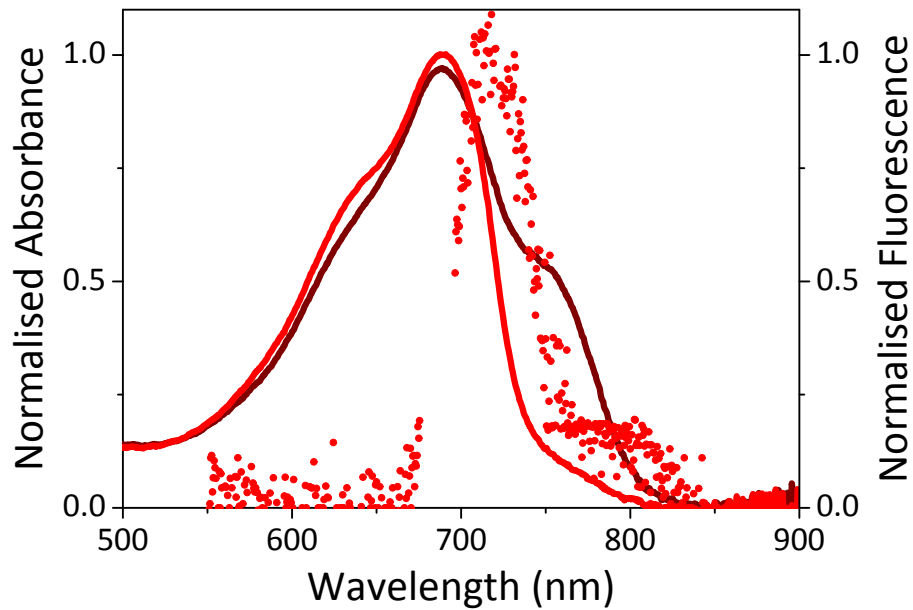

**Fig. S3.** Absorption and fluorescence spectra of FphAN753 in the Pr (red) and Pfr (dark red) forms. Pfr is not fluorescent. Pr represents the dark adapted form.

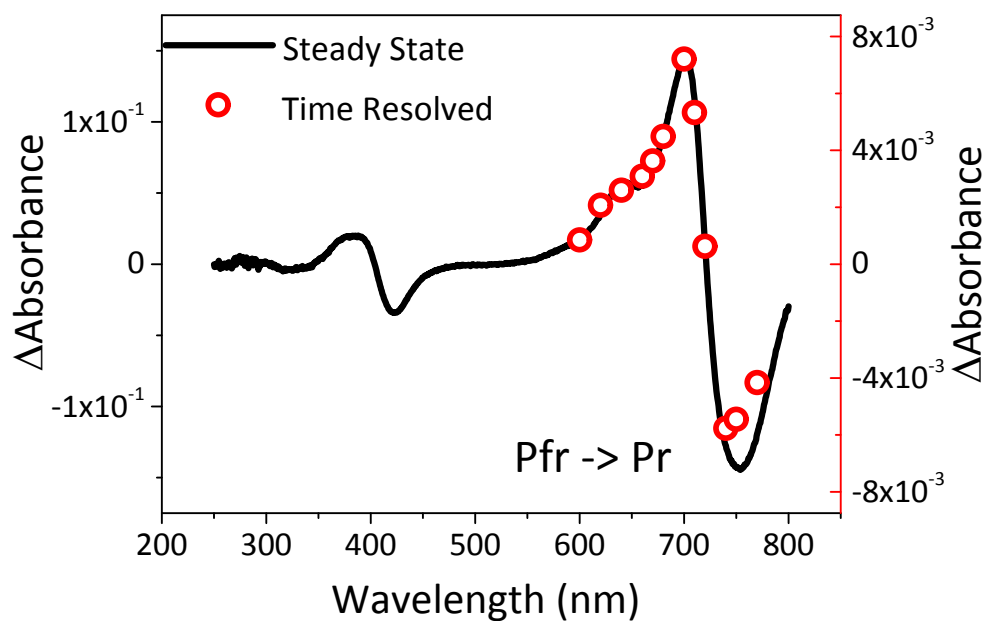

**Fig. S4.** Comparison of matched  $\Delta A$  values for detected wavelengths to the steady state absorption difference spectrum of PstBphP1, for the Pfr-to-Pr route (pump beam  $wl = 760$  nm). Steady state spectrum and absorption values at the end of the flash photolysis experiment (at  $20^\circ\text{C}$ ) are presented with difference spectrum (Pr-Pfr). Steady state spectrum and absorption values at the end of the flash photolysis experiment (at  $20^\circ\text{C}$ ) are presented with different scales for the y-axes.

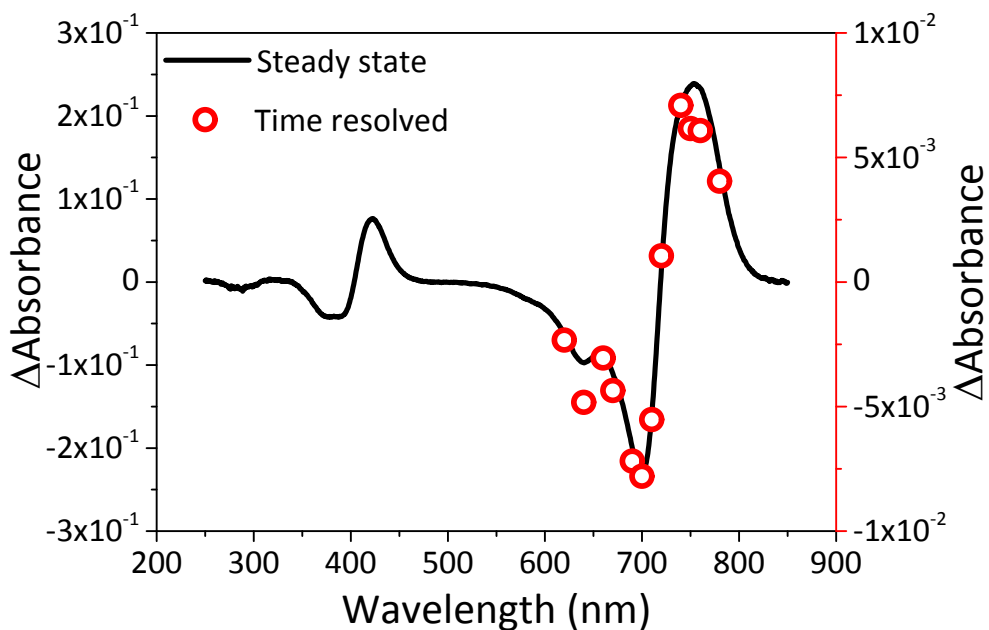

**Fig. S6.** Comparison of matched  $\Delta A$  values for detected wavelengths to the steady state absorption difference spectrum of *PaBphP*, for the Pr-to-Pfr route (pump beam  $wl = 760$  nm). Steady state spectrum and absorption values at the end of the flash photolysis experiment (at  $20^\circ\text{C}$ ) are presented with difference spectrum (Pfr-Pr) . Steady state spectrum and absorption values at the end of the flash photolysis experiment (at  $20^\circ\text{C}$ ) are presented with different scales for the y-axes.

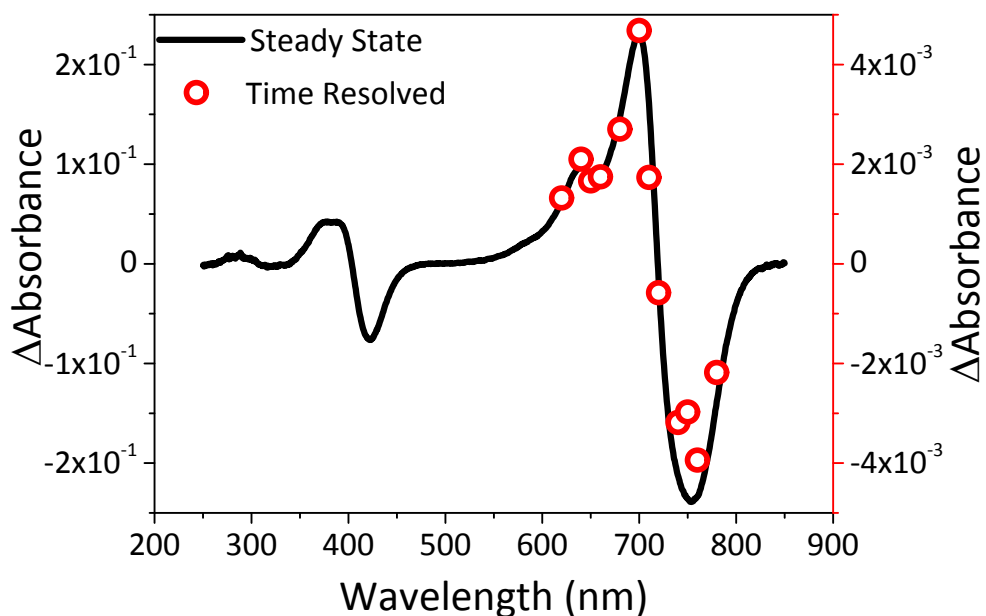

**Fig. S6.** Comparison of matched  $\Delta A$  values for detected wavelengths to the steady state absorption difference spectrum of *PaBphP*, for the Pfr-to-Pr route (pump beam  $wl = 760$  nm). Steady state spectrum and absorption values at the end of the flash photolysis experiment (at  $20^\circ\text{C}$ ) are presented with difference spectrum (Pr-Pfr) . Steady state spectrum and absorption values at the end of the flash photolysis experiment (at  $20^\circ\text{C}$ ) are presented with different scales for the y-axes.

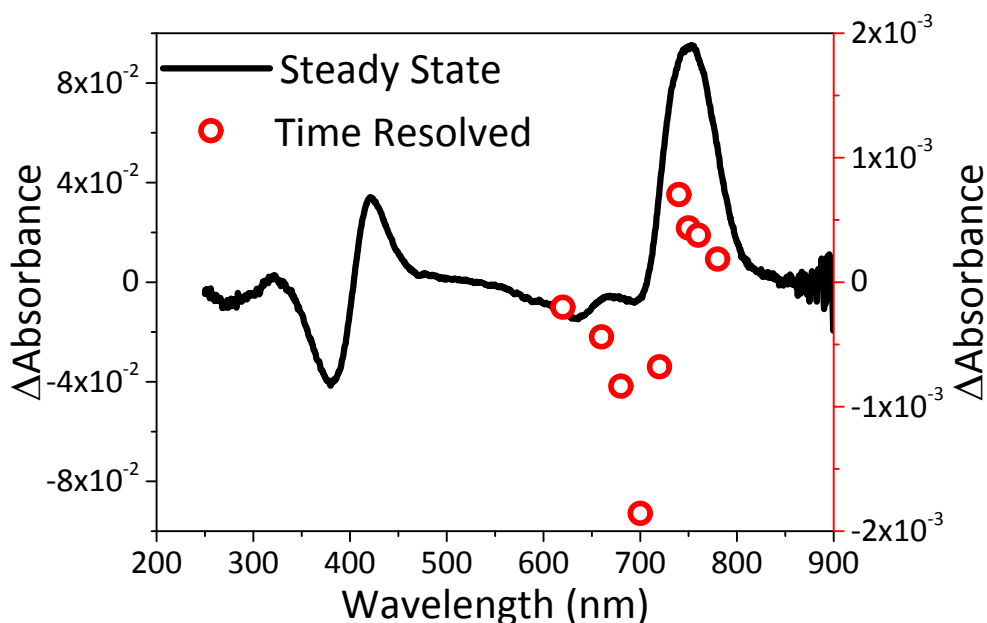

**Fig. S7.** Comparison of matched  $\Delta A$  values for detected wavelengths to the steady state absorption difference spectrum of *FphAN753* for the Pr-to-Pfr route (pump beam  $wl = 650$  nm). Steady state spectrum and absorption values at the end of the flash photolysis experiment (at 20 °C) are presented with difference spectrum (Pfr-Pr) . Steady state spectrum and absorption values at the end of the flash photolysis experiment (at 20 °C) are presented with different scales for the y-axes.

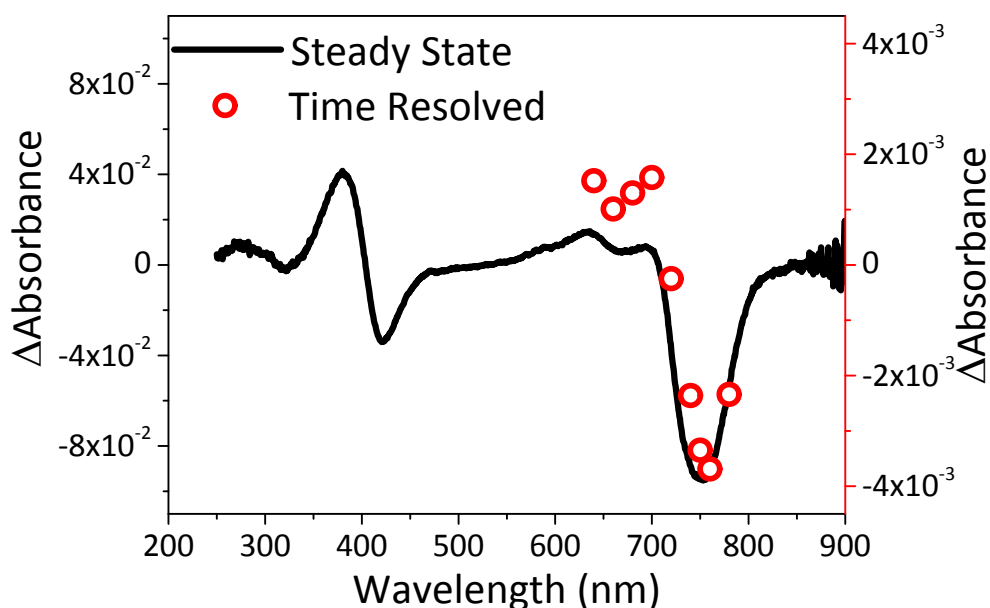

**Fig. S8.** Comparison of matched  $\Delta A$  values for detected wavelengths to the steady state absorption difference spectrum of *FphAN753* for the Pfr-to-Pr route (pump beam  $wl = 760$  nm). Steady state spectrum and absorption values at the end of the flash photolysis experiment (at 20 °C) are presented with difference spectrum (Pr-Pfr) . Steady state spectrum and absorption values at the end of the flash photolysis experiment (at 20 °C) are presented with different scales for the y-axes.

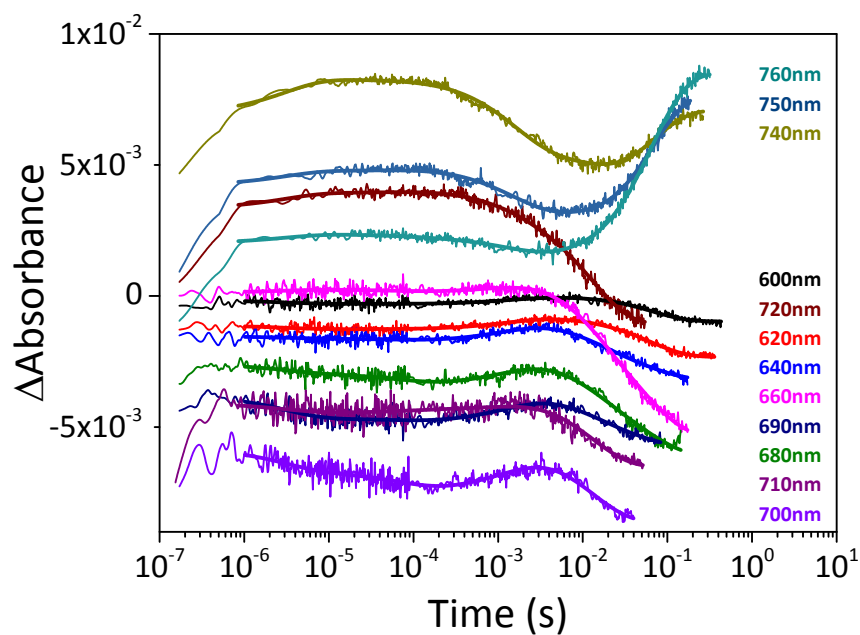

**Fig. S9.** Kinetics for -the Pr-to-Pfr photoconversion in *PstBphP1* , detected at several wavelengths; note the logarithmic time axis.

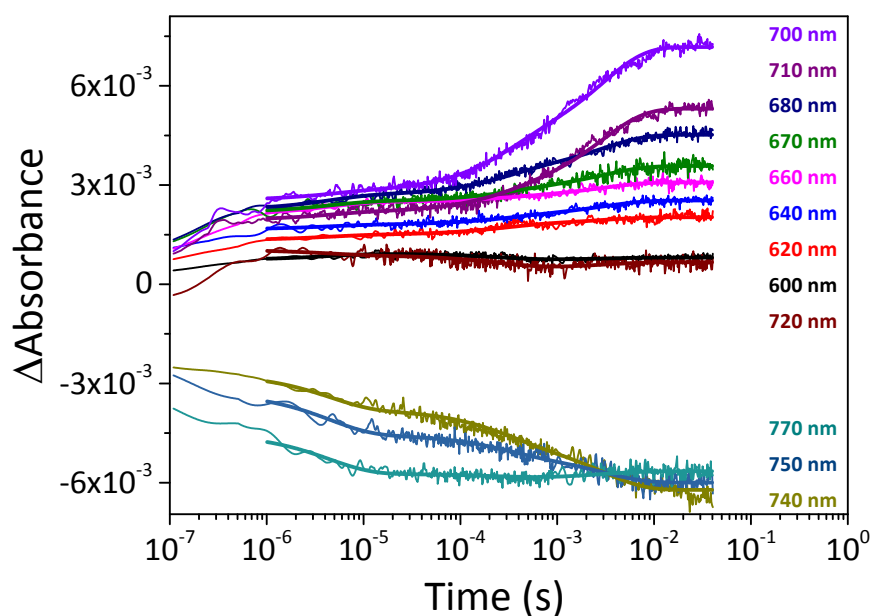

**Fig. S10.** Kinetics for -the Pfr-to-Pr photoconversion in *PstBphP1* , detected at several wavelengths; note the logarithmic time axis.

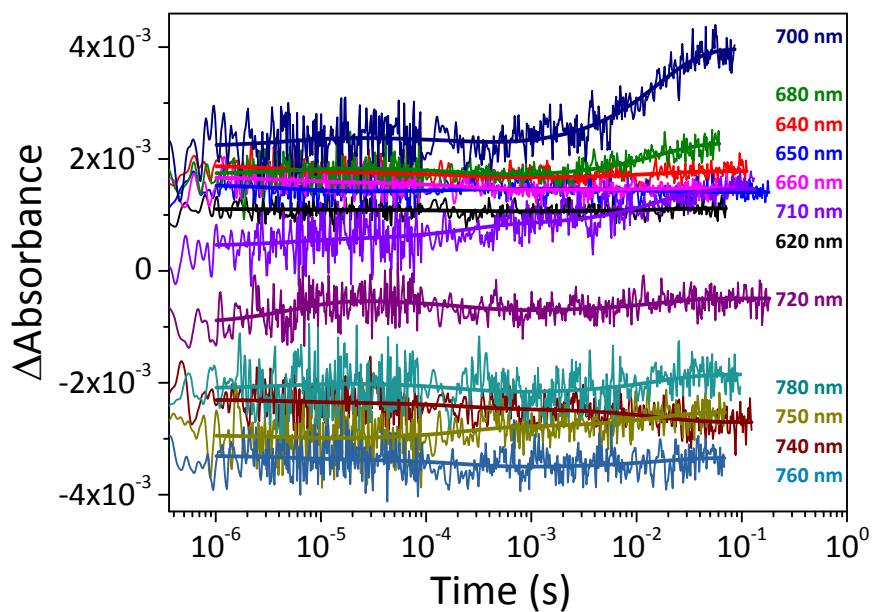

**Fig. S11.** Kinetics for the Pfr-to-Pr photoconversion in *PaBphP*, detected at several wavelengths; note the logarithmic time axis.

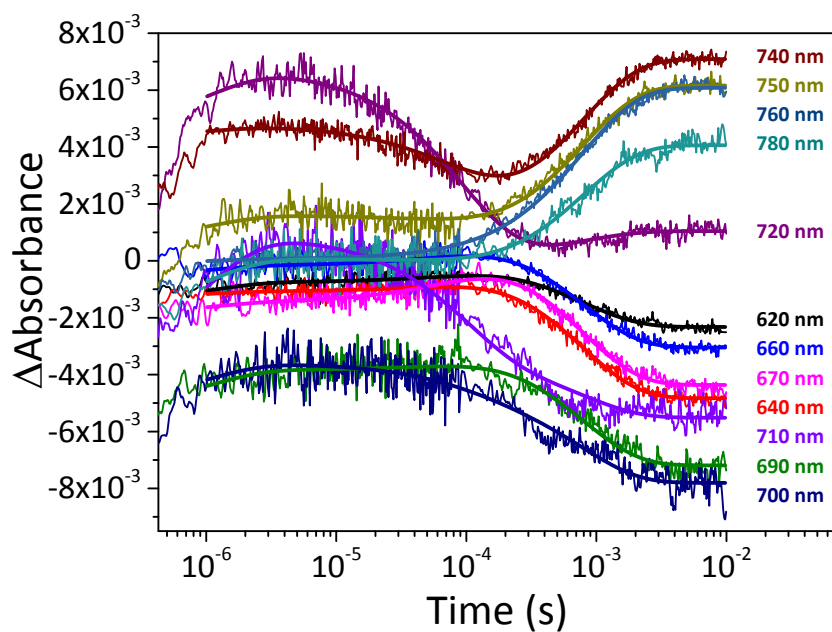

**Fig. S12.** Kinetics for the Pr-to-Pfr photoconversion in *PaBphP*, detected at several wavelengths; note the logarithmic time axis.

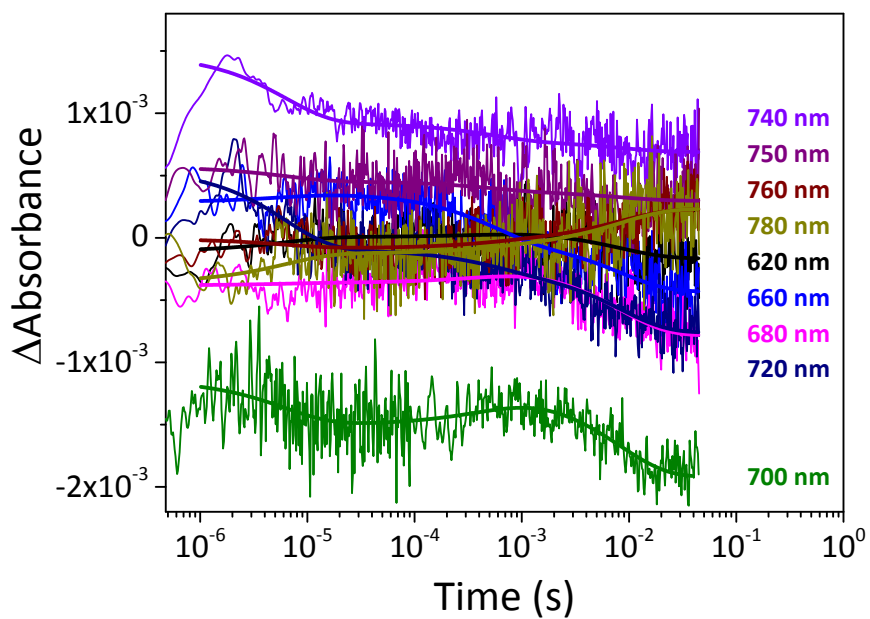

**Fig. S13.** Kinetics for the Pr-to-Pfr photoconversion in FphAN753, detected at several wavelengths; note the logarithmic time axis.

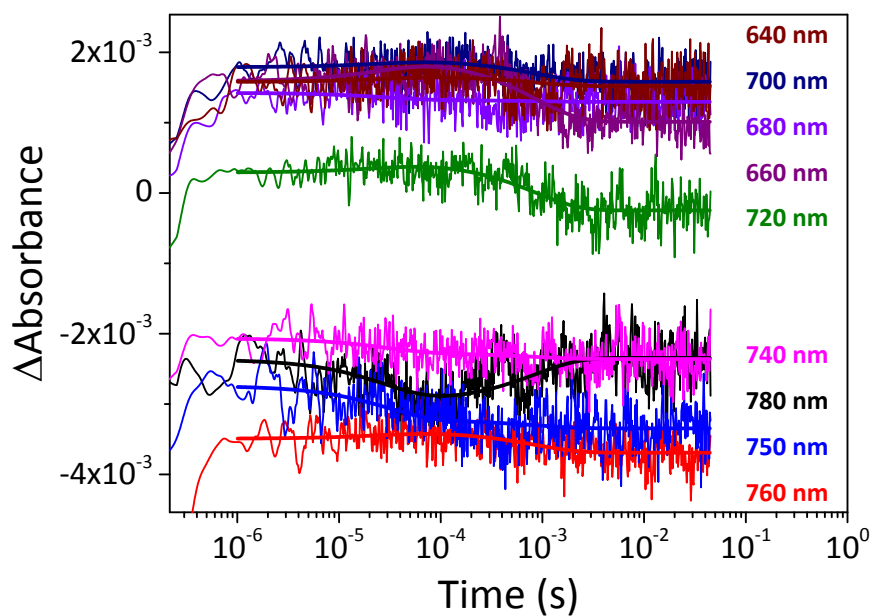

**Fig. S14.** Kinetics for the Pfr-to-Pr photoconversion in FphAN753, detected at several wavelengths; note the logarithmic time axis.
